# Supplementary material for: Prediction of Nephropathy in Type 2 Diabetes: An Analysis of the ACCORD Trial Applying Machine Learning Techniques
Source: PubMed Central journal article supplement — Clin Transl Sci. 2019 May 31;12(5):519–28. doi: 10.1111/cts.12647 (PMC6742939; doi:10.1111/cts.12647), 2019-05-31
Supplement: CTS-12-519-s001.pdf [file CTS-12-519-s001.pdf]

**Figure S1. Discrete-time data format for model development.\***

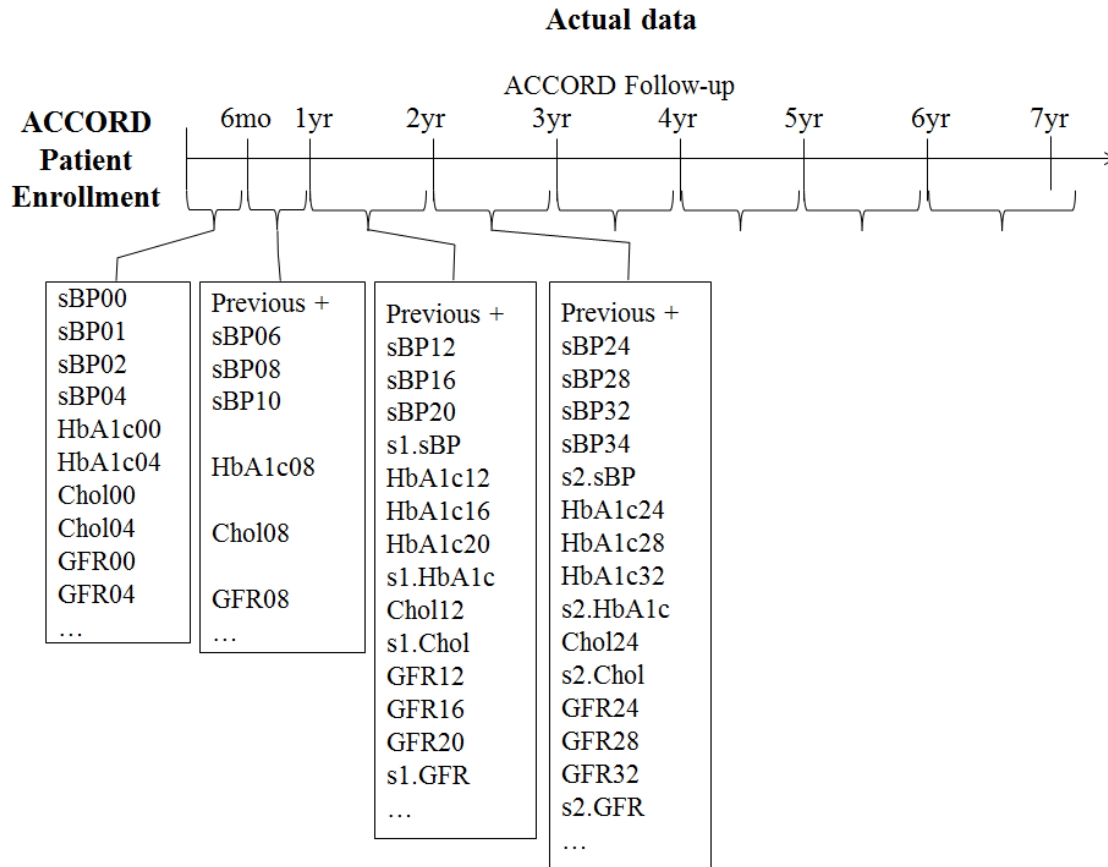

\*As shown, time was separated into 8 discrete intervals: 0 to 5.9 months; 6 to 11.9 months; 12 months to 1.9 years; 2 to 2.9 years; 3 to 3.9 years; 4 to 4.9 years; 5 to 5.9 years; and 6 years till the end of the 7 year study. The attribute values within each time block are used to predict whether the outcome (diabetic nephropathy) occurs by the end of that interval.

Numbers following an attribute indicate the number of months from baseline (00) while numbers preceding the attribute and accompanied by a slope (s) denote the year of change.

Abbreviations: Chol = cholesterol; GFR = Glomerular Filtration Rate; HbA1c = glycosylated hemoglobin; s = slope of change; sBP = systolic blood pressure.
